# Supplementary material
Source: HighWire-hosted journal article supplement (https://jnm.snmjournals.org/highwire/filestream/94572/field_highwire_adjunct_files/0/122895_Supplemental_Data.pdf)
Supplement: 122895_Supplemental_Data.pdf [file 122895_Supplemental_Data.pdf]

SUPPLEMENTAL TABLE 1. Summary of kinetic modeling parameters for [<sup>18</sup>F]MNI-659 for 2TCM, 1TCM, Logan and SRTM for acquisitions of 210 and 90 min (n=10, mean ± sd).

| Model | Parameter            | 210 min       |               |                 |               | 90 min        |               |                 |               |
|-------|----------------------|---------------|---------------|-----------------|---------------|---------------|---------------|-----------------|---------------|
|       |                      | Caudate       | Putamen       | Globus Pallidus | Cerebellum    | Caudate       | Putamen       | Globus Pallidus | Cerebellum    |
| 2TCM  | V <sub>T</sub>       | 1.83 ± 0.55   | 2.89 ± 0.85   | 3.08 ± 0.97     | 0.76 ± 0.24   | 1.69 ± 0.52   | 2.69 ± 0.78   | 2.81 ± 0.84     | 0.48 ± 0.13   |
|       | V <sub>T</sub> %SE   | 1.9 ± 0.7     | 1.3 ± 0.4     | 1.8 ± 0.6       | 13.3 ± 7.5    | 3.5 ± 4.5     | 2.5 ± 1       | 5.7 ± 4.5       | 7.8 ± 7.4     |
|       | K <sub>1</sub>       | 0.060 ± 0.022 | 0.078 ± 0.024 | 0.056 ± 0.018   | 0.070 ± 0.022 | 0.062 ± 0.025 | 0.085 ± 0.033 | 0.054 ± 0.016   | 0.085 ± 0.049 |
|       | K <sub>1</sub> %SE   | 2.8 ± 2.3     | 2.6 ± 1.4     | 2.3 ± 0.8       | 3.5 ± 1.8     | 3.2 ± 0.8     | 5.8 ± 6.1     | 3.1 ± 0.8       | 4.5 ± 3.5     |
|       | AIC                  | 24.9 ± 24.6   | -0.6 ± 30     | 0.9 ± 13.3      | 85.4 ± 45.2   | 17.5 ± 19.5   | 2.6 ± 14.6    | 9.1 ± 8.4       | 54.7 ± 18.4   |
|       | MSC                  | 4.8 ± 0.6     | 5.1 ± 0.6     | 4.7 ± 0.3       | 4.3 ± 0.9     | 4.6 ± 0.8     | 4.8 ± 0.4     | 4.3 ± 0.4       | 4.4 ± 0.6     |
|       | BP <sub>P</sub>      | 1.07 ± 0.46   | 2.13 ± 0.74   | 2.32 ± 0.82     | ---           | 1.21 ± 0.44   | 2.21 ± 0.68   | 2.33 ± 0.73     | ---           |
|       | BP <sub>ND</sub>     | 1.5 ± 0.67    | 2.97 ± 1.09   | 3.16 ± 0.99     | ---           | 2.55 ± 0.86   | 4.65 ± 1.24   | 4.87 ± 1.15     | ---           |
| 1TCM  | V <sub>T</sub>       | 1.69 ± 0.54   | 2.71 ± 0.82   | 2.84 ± 0.91     | 0.36 ± 0.11   | 1.61 ± 0.51   | 2.51 ± 0.75   | 2.5 ± 0.79      | 0.36 ± 0.11   |
|       | V <sub>T</sub> %SE   | 2.3 ± 0.4     | 2.4 ± 0.4     | 2.4 ± 0.4       | 4.8 ± 0.9     | 2.6 ± 0.6     | 2.7 ± 0.6     | 2.9 ± 0.6       | 4.9 ± 1.1     |
|       | K <sub>1</sub>       | 0.050 ± 0.016 | 0.062 ± 0.018 | 0.046 ± 0.014   | 0.063 ± 0.02  | 0.051 ± 0.017 | 0.065 ± 0.019 | 0.049 ± 0.015   | 0.064 ± 0.02  |
|       | K <sub>1</sub> %SE   | 2.2 ± 0.4     | 2.3 ± 0.4     | 2.2 ± 0.4       | 5.4 ± 1.1     | 2.2 ± 0.5     | 2.4 ± 0.8     | 2.1 ± 0.5       | 5.6 ± 1.5     |
|       | AIC                  | 80.6 ± 14.1   | 82.1 ± 15.8   | 75.4 ± 14.4     | 151.1 ± 17.5  | 49.2 ± 10.2   | 47.6 ± 15.5   | 37.4 ± 12       | 94.6 ± 14.8   |
|       | MSC                  | 3.6 ± 0.4     | 3.3 ± 0.3     | 3.1 ± 0.3       | 2.9 ± 0.4     | 3.5 ± 0.4     | 3.2 ± 0.5     | 3.3 ± 0.3       | 3 ± 0.5       |
|       | BP <sub>P</sub>      | 1.33 ± 0.44   | 2.34 ± 0.72   | 2.47 ± 0.8      | ---           | 1.26 ± 0.42   | 2.15 ± 0.66   | 2.14 ± 0.69     | ---           |
|       | BP <sub>ND</sub>     | 3.69 ± 0.73   | 6.53 ± 1.1    | 6.84 ± 0.92     | ---           | 3.53 ± 0.68   | 6.07 ± 0.99   | 6.01 ± 0.79     | ---           |
| Logan | V <sub>T</sub>       | 1.81 ± 0.53   | 2.84 ± 0.81   | 2.95 ± 0.90     | 0.71 ± 0.20   | 1.67 ± 0.51   | 2.64 ± 0.76   | 2.67 ± 0.82     | 0.55 ± 0.15   |
|       | V <sub>T</sub> %SE   | 0.5 ± 0.2     | 0.3 ± 0.1     | 0.6 ± 0.2       | 2.4 ± 0.7     | 0.7 ± 0.2     | 0.8 ± 0.1     | 1.6 ± 0.2       | 2.4 ± 1       |
|       | BP <sub>P</sub>      | 1.1 ± 0.4     | 2.13 ± 0.66   | 2.24 ± 0.73     | ---           | 1.12 ± 0.39   | 2.09 ± 0.64   | 2.12 ± 0.68     | ---           |
|       | BP <sub>ND</sub>     | 1.58 ± 0.49   | 3.04 ± 0.73   | 3.16 ± 0.63     | ---           | 2.05 ± 0.54   | 3.82 ± 0.78   | 3.85 ± 0.66     | ---           |
| SRTM  | BP <sub>ND</sub>     | 1.97 ± 0.5    | 3.51 ± 0.71   | 3.4 ± 0.59      | ---           | 2.13 ± 0.5    | 3.75 ± 0.68   | 3.53 ± 0.56     | ---           |
|       | BP <sub>ND</sub> %SE | 3.2 ± 0.7     | 2.3 ± 0.5     | 1.8 ± 0.4       | ---           | 2 ± 0.5       | 1.5 ± 0.4     | 2.3 ± 0.5       | ---           |
|       | R <sub>1</sub>       | 0.79 ± 0.09   | 1.01 ± 0.08   | 0.79 ± 0.09     | ---           | 0.81 ± 0.09   | 1.04 ± 0.08   | 0.81 ± 0.09     | ---           |
|       | R <sub>1</sub> %SE   | 0.8 ± 0.1     | 1 ± 0.1       | 0.8 ± 0.1       | ---           | 0.8 ± 0.1     | 1 ± 0.1       | 0.8 ± 0.1       | ---           |
|       | AIC                  | 72.9 ± 13.9   | 55.5 ± 18.9   | 29.7 ± 21.6     | ---           | 17.4 ± 11.4   | 3.5 ± 14.5    | 16.3 ± 10.8     | ---           |
|       | MSC                  | 3.7 ± 0.3     | 3.9 ± 0.4     | 4 ± 0.4         | ---           | 4.5 ± 0.6     | 4.7 ± 0.6     | 4 ± 0.4         | ---           |

SUPPLEMENTAL TABLE 2. [<sup>18</sup>F]MNI-659 V<sub>T</sub> test-retest for 2TCM, 1TCM and Logan for 210 min acquisitions (n=5, mean ± sd).

| Model | Parameter      | Caudate     |             | Putamen     |             | Globus Pallidus |             | Cerebellum  |             |
|-------|----------------|-------------|-------------|-------------|-------------|-----------------|-------------|-------------|-------------|
|       |                | Scan 1      | Scan 2      | Scan 1      | Scan 2      | Scan 1          | Scan 2      | Scan 1      | Scan 2      |
| 2TCM  | V <sub>T</sub> | 1.83 ± 0.61 | 1.82 ± 0.54 | 2.96 ± 0.94 | 2.82 ± 0.84 | 3.11 ± 0.98     | 3.05 ± 1.08 | 0.74 ± 0.25 | 0.78 ± 0.26 |
|       | VAR            | 29 ± 15 %   |             | 30 ± 11 %   |             | 27 ± 12 %       |             | 21 ± 15 %   |             |
|       | ICC            | 0.50        |             | 0.46        |             | 0.67            |             | 0.77        |             |
| 1TCM  | V <sub>T</sub> | 1.73 ± 0.62 | 1.65 ± 0.51 | 2.80 ± 0.94 | 2.61 ± 0.77 | 2.92 ± 0.99     | 2.75 ± 0.93 | 0.37 ± 0.13 | 0.36 ± 0.10 |
|       | VAR            | 30 ± 13 %   |             | 31 ± 11 %   |             | 29 ± 10 %       |             | 33 ± 10 %   |             |
|       | ICC            | 0.56        |             | 0.49        |             | 0.64            |             | 0.42        |             |
| Logan | V <sub>T</sub> | 1.83 ± 0.58 | 1.80 ± 0.53 | 2.91 ± 0.88 | 2.77 ± 0.82 | 2.99 ± 0.90     | 2.90 ± 0.99 | 0.70 ± 0.18 | 0.72 ± 0.23 |
|       | VAR            | 28 ± 15 %   |             | 30 ± 13 %   |             | 28 ± 12 %       |             | 27 ± 17 %   |             |
|       | ICC            | 0.51        |             | 0.47        |             | 0.61            |             | 0.50        |             |

SUPPLEMENTAL TABLE 3. [<sup>18</sup>F]MNI-659 BP<sub>p</sub> test-retest for 2TCM, 1TCM and Logan for 210 min acquisitions (n=5, mean ± sd).

| Model | Parameter       | Caudate     |             | Putamen     |             | Globus Pallidus |             |
|-------|-----------------|-------------|-------------|-------------|-------------|-----------------|-------------|
|       |                 | Scan 1      | Scan 2      | Scan 1      | Scan 2      | Scan 1          | Scan 2      |
| 2TCM  | BP <sub>p</sub> | 1.09 ± 0.52 | 1.05 ± 0.44 | 2.22 ± 0.83 | 2.04 ± 0.72 | 2.37 ± 0.82     | 2.27 ± 0.90 |
|       | VAR             | 30 ± 15 %   |             | 35 ± 12 %   |             | 29 ± 13 %       |             |
|       | ICC             | 0.64        |             | 0.52        |             | 0.70            |             |
| 1TCM  | BP <sub>p</sub> | 1.36 ± 0.51 | 1.29 ± 0.42 | 2.43 ± 0.82 | 2.26 ± 0.68 | 2.55 ± 0.86     | 2.40 ± 0.83 |
|       | VAR             | 29 ± 14 %   |             | 31 ± 12 %   |             | 29 ± 11 %       |             |
|       | ICC             | 0.61        |             | 0.51        |             | 0.67            |             |
| Logan | BP <sub>p</sub> | 1.13 ± 0.43 | 1.07 ± 0.40 | 2.21 ± 0.73 | 2.05 ± 0.67 | 2.29 ± 0.74     | 2.18 ± 0.81 |
|       | VAR             | 29 ± 14 %   |             | 31 ± 11 %   |             | 28 ± 11 %       |             |
|       | ICC             | 0.62        |             | 0.51        |             | 0.65            |             |

SUPPLEMENTAL TABLE 4. [<sup>18</sup>F]MNI-659 BP<sub>ND</sub> test-retest for 2TCM, 1TCM, Logan and SRTM for 210 min acquisitions (n=5, mean ± sd).

| Model | Parameter        | Caudate     |             | Putamen     |             | Globus Pallidus |             |
|-------|------------------|-------------|-------------|-------------|-------------|-----------------|-------------|
|       |                  | Scan 1      | Scan 2      | Scan 1      | Scan 2      | Scan 1          | Scan 2      |
| 2TCM  | BP <sub>ND</sub> | 1.57 ± 0.81 | 1.44 ± 0.59 | 3.17 ± 1.31 | 2.76 ± 0.92 | 3.35 ± 1.16     | 2.98 ± 0.87 |
|       | VAR              | 14 ± 6 %    |             | 20 ± 4 %    |             | 14 ± 6 %        |             |
|       | ICC              | 0.93        |             | 0.87        |             | 0.89            |             |
| 1TCM  | BP <sub>ND</sub> | 3.76 ± 0.93 | 3.61 ± 0.57 | 6.76 ± 1.45 | 6.30 ± 0.68 | 7.08 ± 1.18     | 6.60 ± 0.63 |
|       | VAR              | 8 ± 6 %     |             | 7 ± 9 %     |             | 9 ± 7 %         |             |
|       | ICC              | 0.84        |             | 0.71        |             | 0.61            |             |
| Logan | BP <sub>ND</sub> | 1.61 ± 0.49 | 1.56 ± 0.54 | 3.15 ± 0.72 | 2.93 ± 0.80 | 3.27 ± 0.57     | 3.04 ± 0.73 |
|       | VAR              | 9 ± 6 %     |             | 8 ± 10 %    |             | 9 ± 8 %         |             |
|       | ICC              | 0.96        |             | 0.91        |             | 0.88            |             |
| SRTM  | BP <sub>ND</sub> | 1.97 ± 0.51 | 1.97 ± 0.55 | 3.60 ± 0.72 | 3.42 ± 0.78 | 3.50 ± 0.53     | 3.29 ± 0.69 |
|       | VAR              | 7 ± 4 %     |             | 6 ± 8 %     |             | 8 ± 6 %         |             |
|       | ICC              | 0.96        |             | 0.93        |             | 0.89            |             |

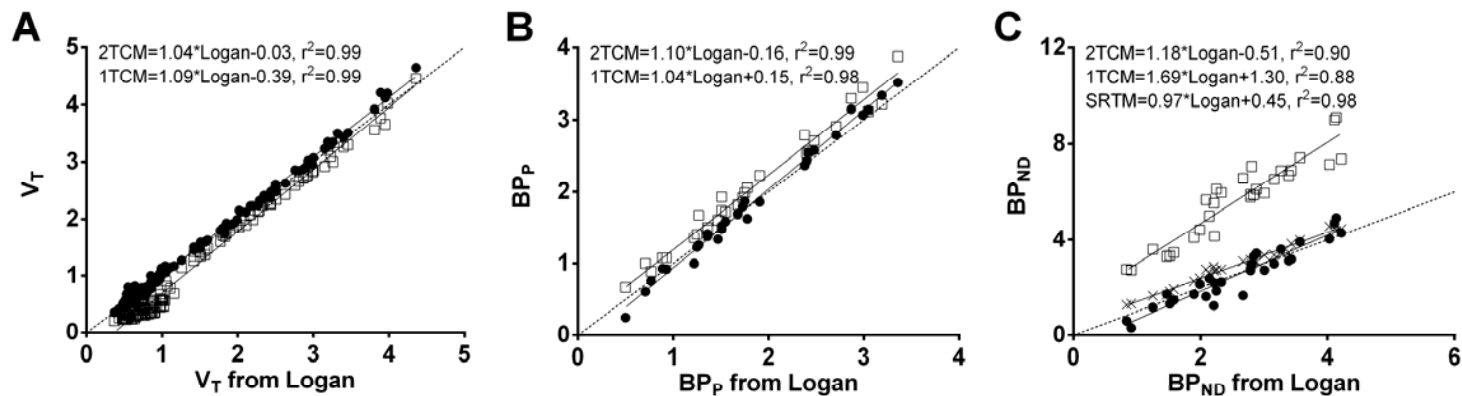

SUPPLEMENTAL FIGURE 1. (A) Correlation of  $^{18}\text{F}$ -MNI-659 2TCM and 1TCM 210 min  $V_T$  estimates against Logan  $V_T$  estimates (all regions). (B) Correlation of  $^{18}\text{F}$ -MNI-659 2TCM and 1TCM 210 min  $\text{BP}_P$  estimates against Logan  $\text{BP}_P$  estimates (caudate, putamen and globus pallidus). (C) Correlation of  $^{18}\text{F}$ -MNI-659 2TCM, 1TCM and SRTM 210 min  $\text{BP}_{\text{ND}}$  estimates against Logan  $\text{BP}_{\text{ND}}$  estimates (caudate, putamen and globus pallidus). Closed circle = 2TCM; open square = 1TCM; cross = SRTM; solid line = linear regression fit; dashed line = line of identity. For  $V_T$ , 2TCM and 1TCM correlated well with Logan, close to the line of identity. Regions with low  $V_T$  (cerebellum) were however underestimated for 1TCM compared to Logan (-50%). For  $\text{BP}_P$ , there was again a good agreement with  $r^2 > 0.99$  and a slope close to 1.0. 1TCM overestimated  $\text{BP}_P$  by 10-20%, due to the underestimation of  $V_T$ . For  $\text{BP}_{\text{ND}}$ , SRTM correlated well with Logan estimates with  $r^2 > 0.98$ , with an overestimation of 10-20%. 2TCM agreed with Logan but 1TCM clearly overestimated  $\text{BP}_{\text{ND}}$  compared to Logan due to the bias of  $V_T$  in the cerebellum.
